# Supplementary material for: Characterization of OA development between sexes in the rat medial meniscal transection model
Source: PubMed Central journal article supplement — Osteoarthr Cartil Open. 2020 Apr 18;2(3):100066. doi: 10.1016/j.ocarto.2020.100066 (PMC9718073; doi:10.1016/j.ocarto.2020.100066), 2020-04-18

Supplemental Figure 1

**a** Normalized Medial 1/3 Articular Cartilage Volume

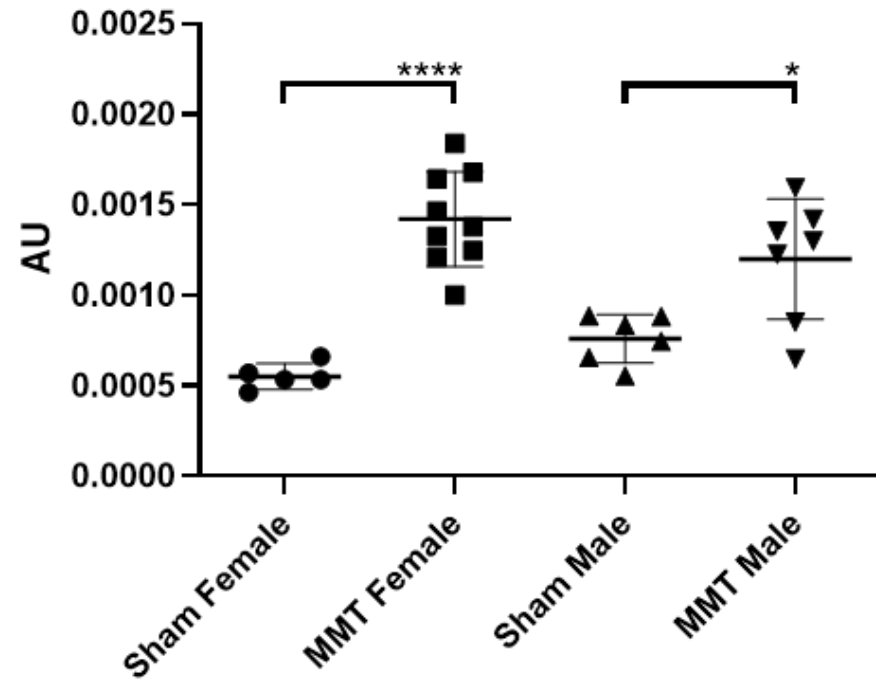

**b** Normalized Medial 1/3 Articular Cartilage Thickness

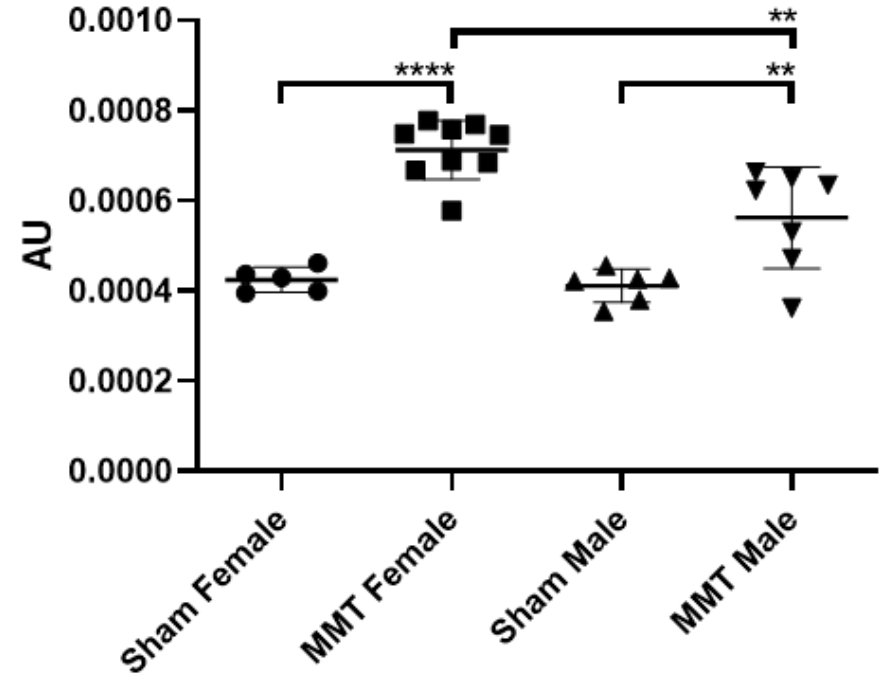

# Supplemental Figure 2

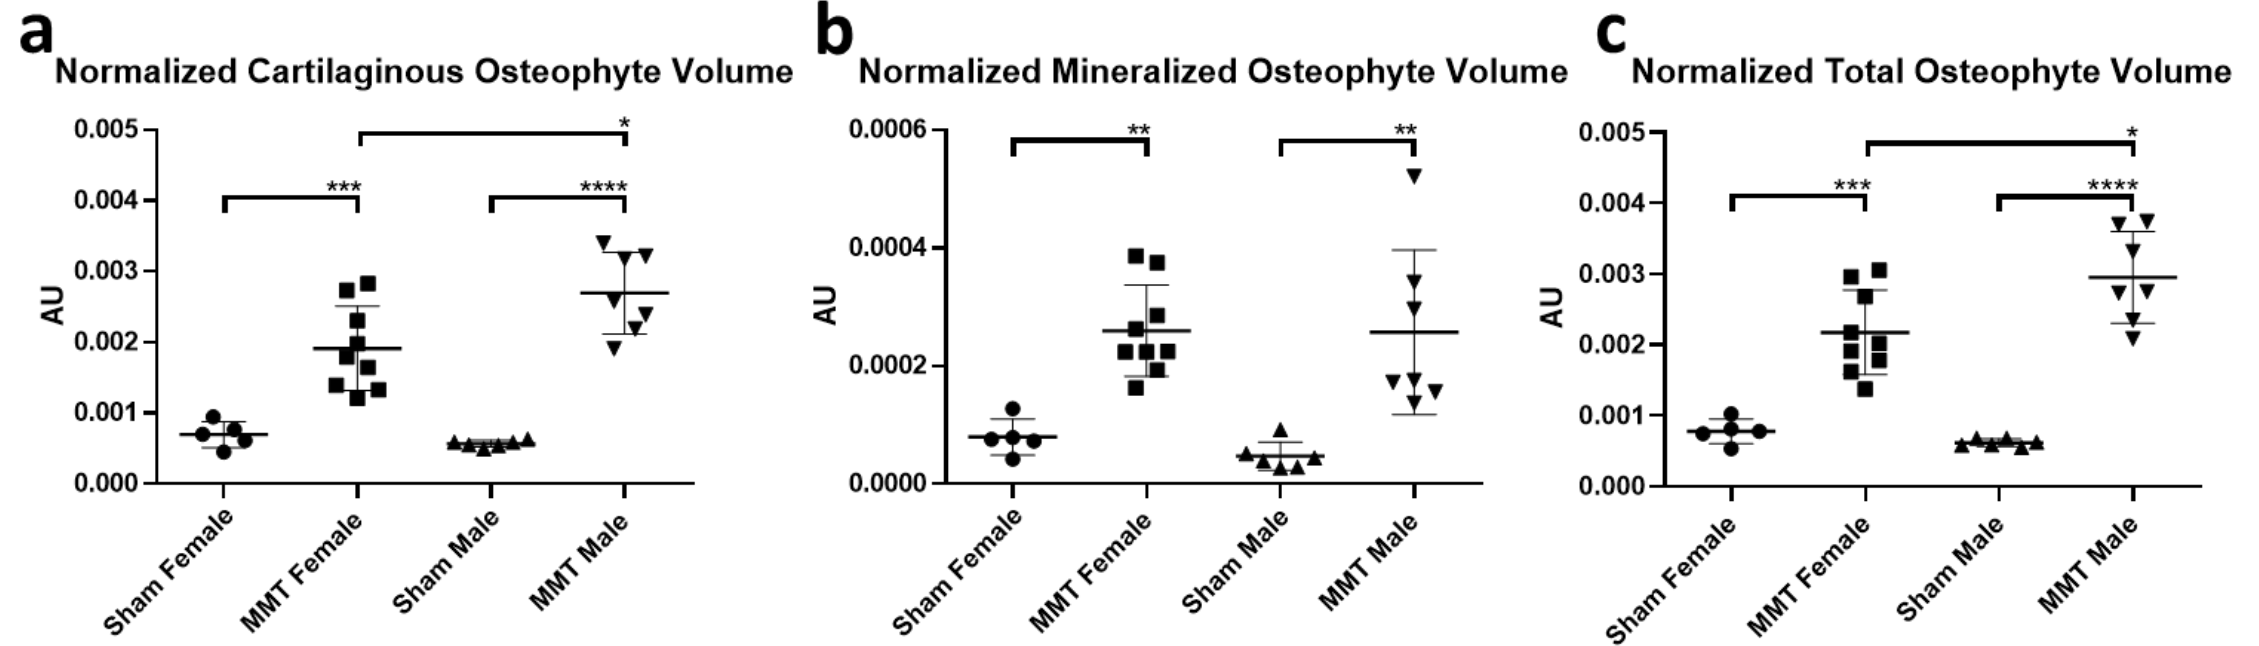

**a** Normalized Medial 1/3 Subchondral Bone Volume

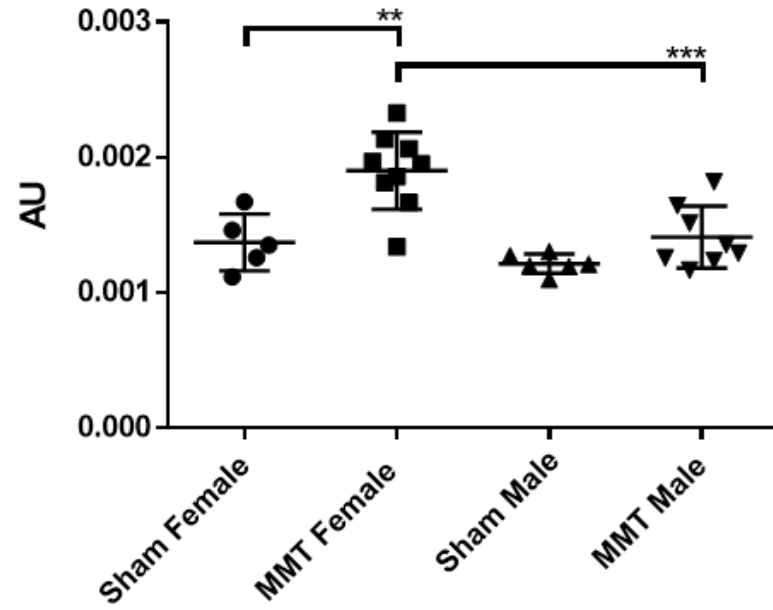

**b** Normalized Medial 1/3 Subchondral Bone Thickness

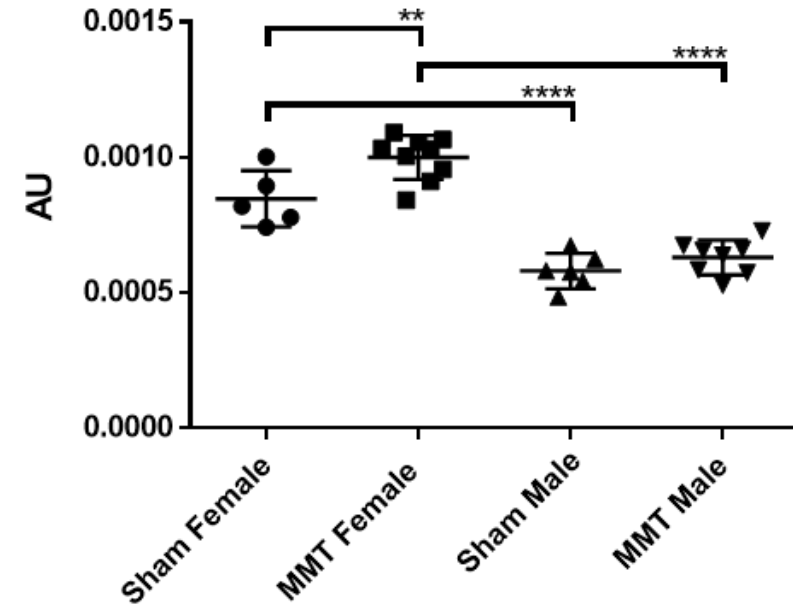

Supplement: mmc1.pdf [file mmc1.pdf]
